# Supplementary material
Source: PubMed Central journal article supplement (PMC327128)

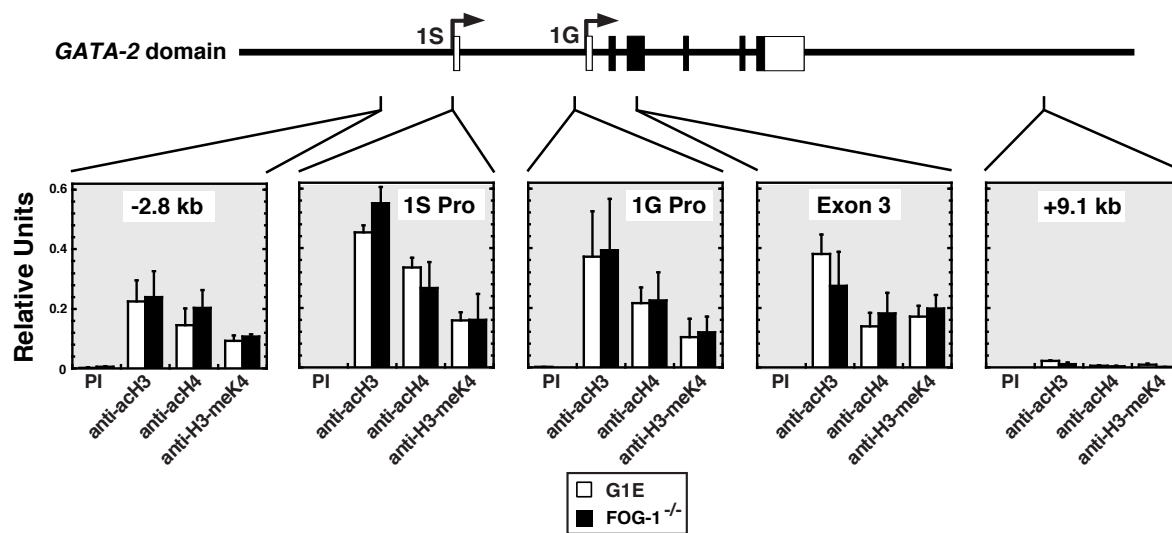

Supplement: pnas_0307612100_3.pdf [file pnas_0307612100_3.pdf]

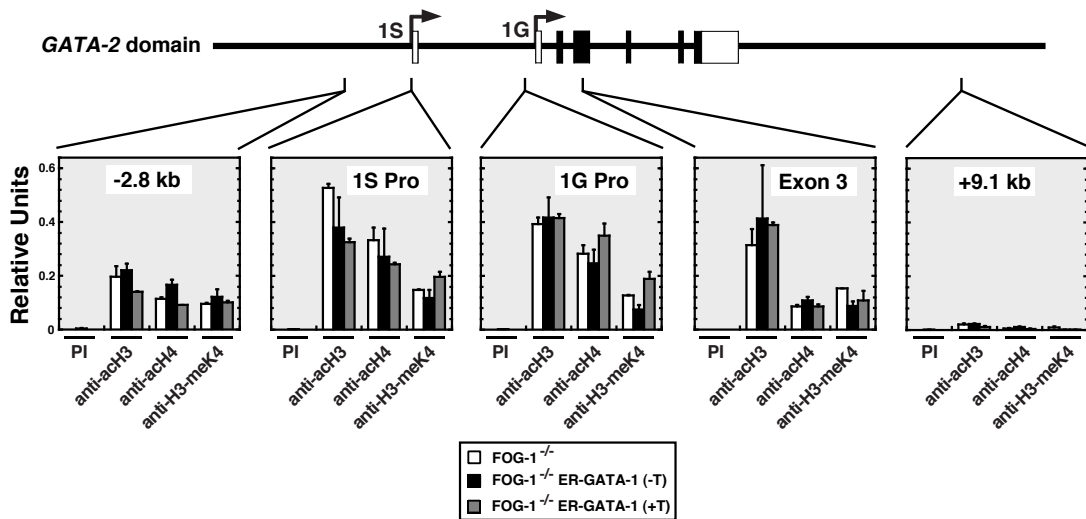

Supplement: pnas_0307612100_5.pdf [file pnas_0307612100_5.pdf]
